# Supplementary material for: Lack of Phylogenetic Differences in Ectomycorrhizal Fungi among Distinct Mediterranean Pine Forest Habitats
Source: MDPI journal article supplement (doi:10.3390/jof7100793), 2021-09-24
Supplement: s1 [file s1]

## Supplementary tables and figures

**Table S1.** Table summarizing the main texture and moisture properties of the study plots: Fine clay content (%), Clay content (%), Sand content (%), Moisture (g water/g soil). Ps: *P. sylvestris*, Pn: *P. nigra*, Ph: *P. halepensis*, Ps-Pn: *P.sylvestris-nigra*, Pn-Ph: *P. nigra-halepensis*.

| Forest type | Range | Fine Lime <sup>-1</sup> | Clay  | Sand  | Moisture |
|-------------|-------|-------------------------|-------|-------|----------|
| Ps          | Min.  | 6.8                     | 5     | 24.8  | 0.54     |
| (14)        | Mean  | 25.4                    | 15.7  | 47.2  | 2.22     |
|             | Max.  | 44.9                    | 31.5  | 83.4  | 4.5      |
| Pn          | Min.  | 21.5                    | 3.30  | 24.7  | 1.19     |
| (14)        | Mean  | 27.95                   | 14.92 | 44.04 | 2.13     |
|             | Max.  | 38.5                    | 37.30 | 54.90 | 4.24     |
| Ph          | Min.  | 17.30                   | 6.5   | 51.10 | 1.2      |
| (4)         | Mean  | 19.75                   | 8.95  | 57    | 1.61     |
|             | Max.  | 23.20                   | 11.40 | 64.80 | 2.70     |
| Ps-Pn       | Min.  | 7.50                    | 9     | 25.10 | 0.78     |
| (7)         | Mean  | 21.10                   | 18    | 49    | 1.80     |
|             | Max.  | 31.90                   | 29.5  | 78.90 | 2.70     |
| Pn-Ph       | Min.  | 32.90                   | 20.10 | 16.20 | 1.30     |
| (3)         | Mean  | 138.23                  | 23.63 | 24.50 | 1.36     |
|             | Max.  | 43.70                   | 29.40 | 30.90 | 1.44     |

**Table S2.** Most abundant ectomycorrhizal species detected in pure and mixed stands of *Pinus spp.*

| <i>P. halepensis</i>           | <i>P. nigra-P. halepensis</i>   | <i>P. nigra</i>                   | <i>P. sylvestris-P. nigra</i>  | <i>P. sylvestris</i>         |
|--------------------------------|---------------------------------|-----------------------------------|--------------------------------|------------------------------|
| <i>Suillus</i> spp.            | <i>Suillus</i> spp.             | <i>Suillus</i> spp.               | <i>Suillus</i> spp.            | <i>Hydnum repandum</i>       |
| <i>Phellodon niger</i>         | <i>Phellodon niger</i>          | <i>Phellodon niger</i>            | <i>Phellodon niger</i>         | <i>Phellodon niger</i>       |
| <i>Rhizopogon mohelnensis</i>  | <i>Inocybe</i> spp.             | <i>Tricholoma</i> spp.            | <i>Tricholoma</i> spp.         | <i>Inocybe ochroalba</i>     |
| <i>Hydnum</i> spp.             | <i>Lactarius sanguifluus</i>    | <i>Hydnum repandum</i>            | <i>Hydnum repandum</i>         | <i>Tricholoma terreum</i>    |
| <i>Russula pallidospora</i>    | <i>Cortinarius hydrobivelus</i> | <i>Russula</i> spp.               | <i>Russula pallidospora</i>    | <i>Russula caerulea</i>      |
| <i>Inocybe ochroalba</i>       | <i>Russula pseudoaeruginea</i>  | <i>Inocybe</i> spp.               | <i>Inocybe ochroalba</i>       | <i>Suillus</i> spp.          |
| <i>Cortinarius vernus</i>      | <i>Craterellus lutescens</i>    | <i>Craterellus cornucopioides</i> | <i>Rhizopogon molhensis</i>    | <i>Rhizopogon molhensis</i>  |
| <i>Tomentella subclavigera</i> | <i>Boletopsis</i> sp.           | <i>Boletus edulis</i>             | <i>Inocybe asterospora</i>     | <i>Russula</i> spp.          |
| <i>Lactarius sanguifluus</i>   | <i>Lactarius deliciosus</i>     | <i>Lactarius sanguifluus</i>      | <i>Sebacina flagelliformis</i> | <i>Lactarius sanguifluus</i> |
| <i>Craterellus lutescens</i>   | <i>Tricholoma</i> sp.           | <i>Tomentella</i> spp.            | <i>Tricholoma terreum</i>      | <i>Craterellus lutescens</i> |
| <i>Russula delica</i>          | <i>Rhizopogon mohelnensis</i>   | <i>Lactarius deliciosus</i>       | <i>Craterellus lutescens</i>   | <i>Lactarius deliciosus</i>  |

|                             |                           |                       |                            |                       |
|-----------------------------|---------------------------|-----------------------|----------------------------|-----------------------|
| <i>Hydnum repandum</i>      | <i>Boletus edulis</i>     | <i>Hydnellum</i> spp. | <i>Boletopsis</i> spp.     | <i>Sebacina</i> spp.  |
| <i>Lactarius deliciosus</i> | <i>Cortinarius vernus</i> | <i>Sebacina</i> spp.  | <i>Sebacina cystidiata</i> | <i>Boletus edulis</i> |

---

**Table S3.** Phylogenetic species turnover, nestedness and total beta diversity values across host tree species stands.

| <i>Tree host</i>          | <i>Phylo <math>\beta</math> sim</i> | <i>Phylo <math>\beta</math> sne</i> | <i>Phylo <math>\beta</math> sor</i> |
|---------------------------|-------------------------------------|-------------------------------------|-------------------------------------|
| <i>P.halepensis</i>       | 0.54                                | 0.09                                | 0.63                                |
| <i>P.nigra</i>            | 0.79                                | 0.06                                | 0.85                                |
| <i>P.sylvestris</i>       | 0.79                                | 0.06                                | 0.85                                |
| <i>P.nigra-halepensis</i> | 0.40                                | 0.14                                | 0.54                                |
| <i>P.sylvestris-nigra</i> | 0.71                                | 0.06                                | 0.78                                |

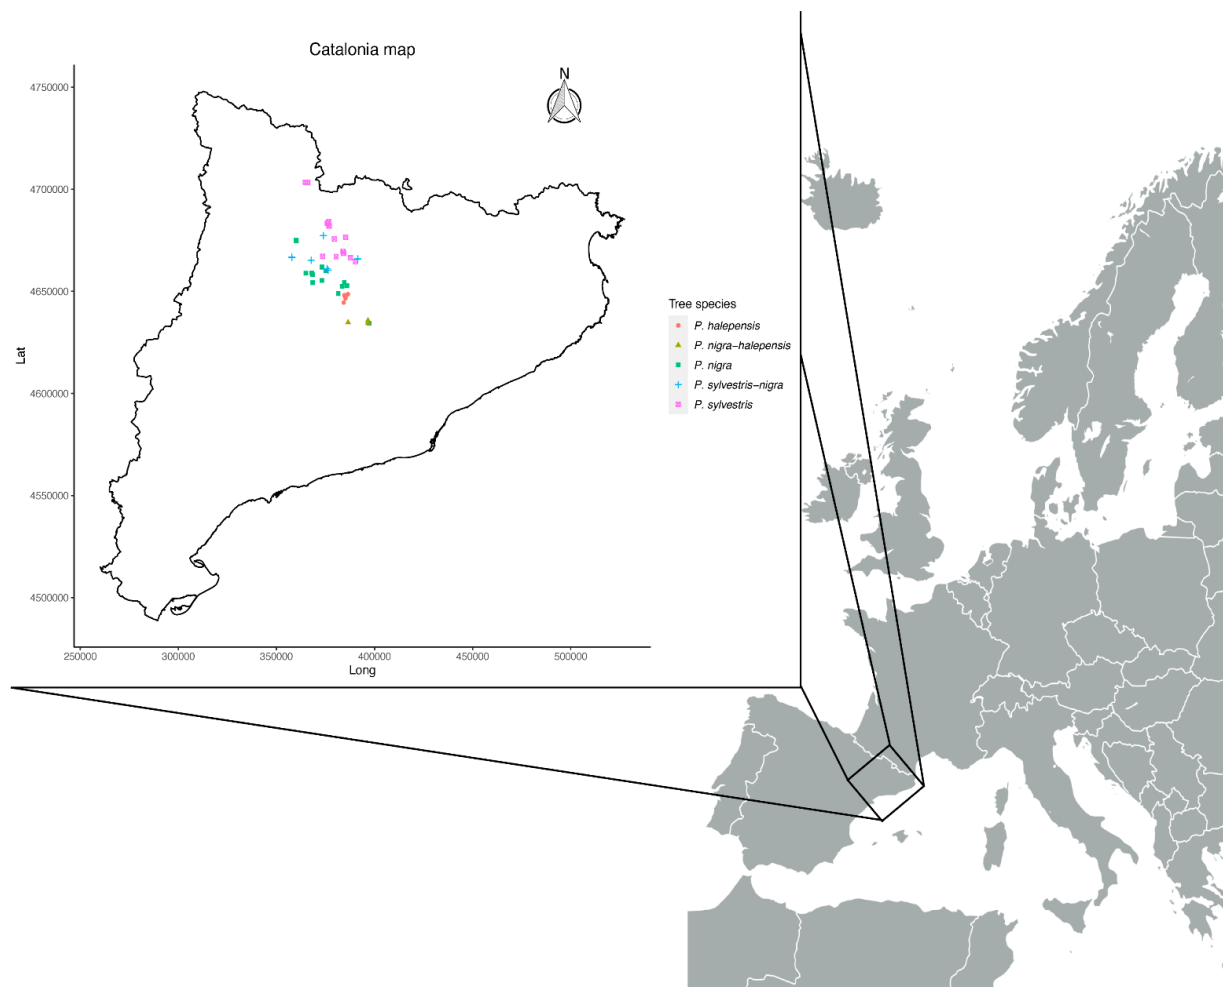

**Fig. S1.** Catalonia map displaying the location of the 42 plots. Colours and shapes correspond to pine tree species: *P. halepensis*, *P. nigra-halepensis*, *P. nigra*, *P. sylvestris-nigra*, *P. sylvestris*.

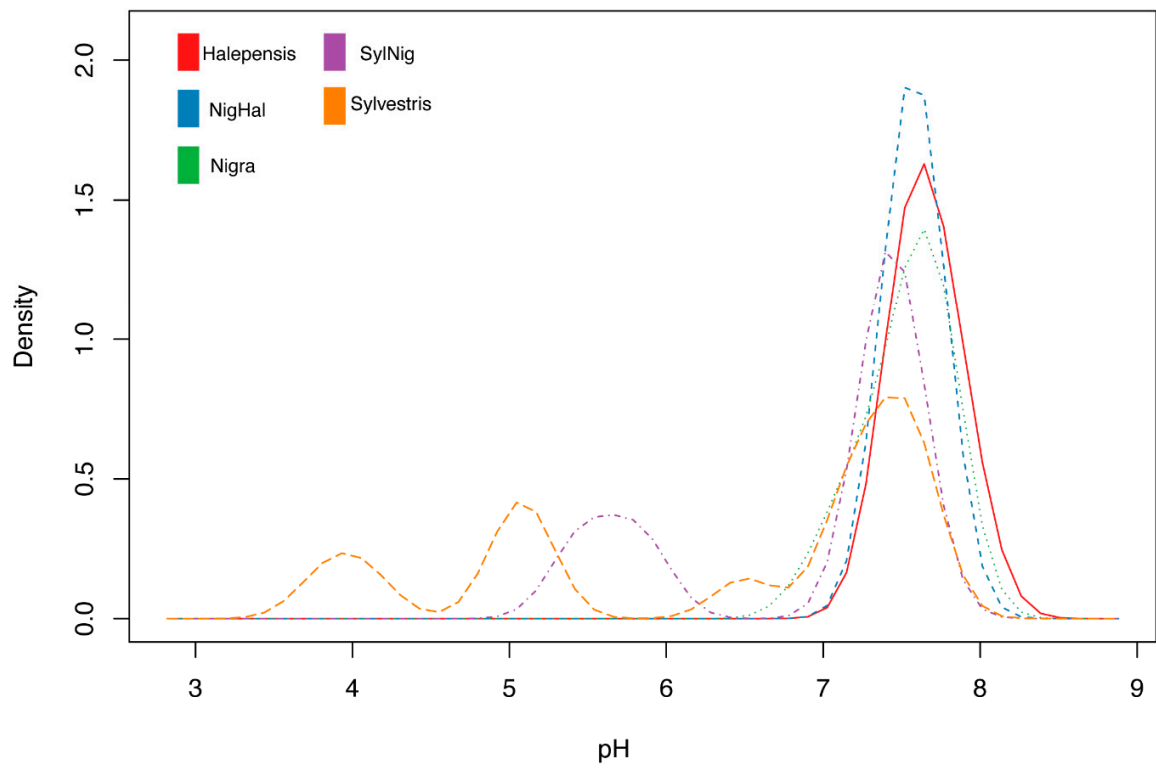

**Fig. S2.** Density curves of pH values of the five tree hosts from the permutational test of density equality (p-value: 0.04)

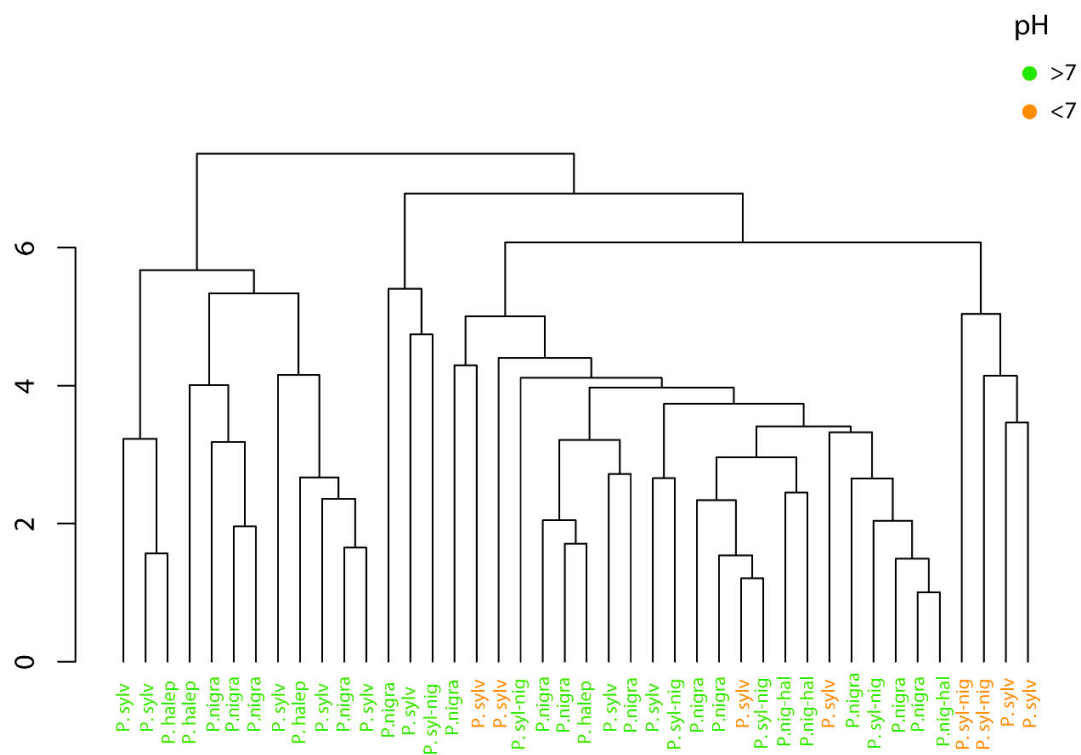

**Fig. S3.** Hierarchical clustering of ectomycorrhizal phylogenetic compositional data based on a Euclidean distance matrix. Tree host species are colored by pH values >7 (green) and pH values <7 (orange).
